# Supplementary material for: No Evidence for Association of OAS1 With Type 1 Diabetes in Unaffected Siblings or Type 1 Diabetic Cases
Source: Oxford University Press journal article supplement (doi:10.2337/db05-1452), 2006-05-01
Supplement: db051452-sup-db1452onlineappendixtable1.doc [file db051452-sup-db1452onlineappendixtable1.doc]

Supplementary Table 1. Association analyses of the *OAS1* nsSNPs rs3741981 and rs3177979 in 1,552 families from UK, USA, Norway and Romania.

| **SNP** | ***n* parent-child-trios** | **Parental**  **MAF (%)** | **T** | **NT** | **%T** | **TDT P** | **RR** | **95% CI** |
| --- | --- | --- | --- | --- | --- | --- | --- | --- |
| rs3741981 | 1,941 | 41.6 (C) | 948 | 922 | 50.7 | 0.55 | 1.03 | 0.94-1.13 |
| rs3177979 | 1,931 | 34.3 (G) | 864 | 860 | 49.8 | 0.85 | 0.99 | 0.90-1.09 |

*n* – number, MAF – minor allele frequency, T – transmitted, NT- not transmitted, TDT - transmission/disequilibrium test *P* values, RR- relative risk, 95% CI- 95% confidence intervals.
