# Supplementary material for: No Evidence for Association of OAS1 With Type 1 Diabetes in Unaffected Siblings or Type 1 Diabetic Cases
Source: Oxford University Press journal article supplement (doi:10.2337/db05-1452), 2006-05-01
Supplement: db051452-sup-db1452onlineappendixtable2.doc [file db051452-sup-db1452onlineappendixtable2.doc]

# Supplementary Table 2. *OAS1* nsSNPs rs3741981 and rs3177979 allele and genotype frequencies and association test results in the type 1 diabetes case-control collection.

| **Case-control**  **collection** | Cases –3,689 | Controls – 4,205 | **OR (95% CI)** | ***P*** |
| --- | --- | --- | --- | --- |
| **rs3741981** |  |  |  |  |
| Alleles 2*n* (%) |  |  | *logistic regression* |  |
| T | 4,195 (56.9) | 4,820 (57.3) | 1.00 (reference) | - |
| C | 3,183 (43.1) | 3,590 (42.7) | 0.96 (0.90-1.03) | 0.25 |
|  |  |  |  |  |
| Genotypes |  |  |  |  |
| TT | 1,193 (32.3) | 1,372 (32.6) | 1.00 (reference) | - |
| CT | 1,809 (49.1) | 2,076(49.4) | 0.94 (0.83-1.07) | 0.38 |
| CC | 687 (18.6) | 757 (18.0) | 0.92 (0.81-1.05) | 0.23 |
|  |  |  |  |  |
| **rs3177979** | **Cases –3,708** | **Controls – 3,851** |  |  |
| Alleles 2*n* (%) |  |  | *logistic regression* |  |
| A | 4,803 ( 64.8) | 5,019 (65.1) | 1.00 (reference) | - |
| G | 2,613 (35.2) | 2,683 (34.9) | 1.00 (0.94-1.08) | 0.89 |
|  |  |  |  |  |
| Genotypes |  |  |  |  |
| AA | 1,551 (41.8) | 1,624 (42.2) | 1.00 (reference) | - |
| AG | 1,701 (45.9) | 1,771 (46.0) | 0.99 (0.89-1.09) | 0.82 |
| GG | 456 (12.3) | 456 (11.8) | 1.02 (0.88-1.19) | 0.76 |

Data are *n* - number (%), unless noted otherwise, OR - odds ratio. 95% CI - 95% confidence interval, n - number.
